# Supplementary material for: Sleep Temporal Entropy as a Novel Digital Biomarker of Sleep Fragmentation for Cardiometabolic and Mortality Risk
Source: Research Square preprint supplement (doi:10.21203/rs.3.rs-7433027/v1), 2025-09-05
Supplement: Supplementary file 1 [file 6e804cca242251cb84d714fd.docx]

# Mathematical and Statistical Methods

## Traditional Metrics

- 1. **Sleep Latency**

The time from lights out to the first onset of sleep (non-wake state), typically measured in minutes.

Where  ​ is the time of the first sleep onset, and ​ is the time when lights are turned off.

- 1. **REM Latency**

The time from sleep onset to the first occurrence of REM (Rapid Eye Movement) sleep.

where ​ is the time of the first REM stage.

- 1. **WASO，Wake After Sleep Onset**

The total duration of wakefulness occurring after sleep onset, typically measured in minutes.

where ​ represents the duration of each wake period, and the sum gives the total WASO.

- 1. **Arousal Index**

The number of awakenings per hour of sleep, used to measure the degree of sleep disruption.

- 1. **Number of Awakenings**

The total number of awakenings that occur from sleep onset until final awakening. This metric is determined by counting the specific occurrences of awakenings during sleep.

- 1. **SFI，Sleep Fragmentation Index**

where refers to the number of transitions between different sleep stages.

## Entropy Based Metrics

- 1. **Walsh Spectral Entropy (WSE):**

A measure of the complexity of sleep stage transitions based on the Walsh transform. It reflects the unpredictability in the sleep stage transitions encoded into frequency components.

where represents the Walsh-transformed frequency components of the encoded sleep stages, and is the number of components.

- 1. **Haar Spectral Entropy (HSE):**

A measure of the complexity of sleep stage transitions based on the Haar wavelet transform. It reflects the unpredictability in the sleep stage transitions when decomposed into wavelet components.

where represents the Haar wavelet coefficients of the encoded sleep stages, and is the number of components.

- 1. **Conditional Entropy (CE):**

A measure of the dependency between consecutive sleep stages, assessing the predictability of a future stage given the current stage. It quantifies the uncertainty in predicting the next sleep stage.

Where is the probability of occurrence of a pattern of consecutive sleep stages, and is the probability of occurrence of a pattern of consecutive sleep stages.

## New Entropy Based Metrics

- 1. **Semi-Markov Transition Matrix Calculation:**

The Semi-Markov transition matrix extends the traditional Markov chain by incorporating the duration of time spent in each state before transitioning to another state.

**Step 1: Define States and Transitions**

- Let be the set of sleep states (e.g., Wake, N1, N2, N3, REM).

- For each state , we record the time spent in that state (stay time) and the transitions to other states .

**Step 2: Transition Count Matrix**

- Construct a Transition Count Matrix , where each element represents the number of observed transitions from state to state .

**Step 3: Calculate Stay Times**

- For each state , we collect the Stay Times which are the durations spent in that state before transitioning to another state.

**Step 4: Fitted Distributions and Cumulative Distribution Function (CDF)**

- Use Kernel Density Estimation (KDE) to fit a distribution to the stay times .

- Calculate the Cumulative Distribution Function (CDF) for the fitted distribution.

**Step 5: Semi-Markov Transition Probability**

- The semi-Markov transition probability from state to state . is calculated by adjusting the standard Markov transition probability with the CDF of the stay time distribution:

Where:

- is the probability of transitioning from state to state as derived from the transition count matrix.

- is the CDF value at the median stay time for state .

**Step 6: Construct the Semi-Markov Transition Matrix**

- The Semi-Markov Transition Matrix is given by:

- 1. **Entropy Calculation Based on the Semi-Markov Matrix**

With the semi-Markov transition matrix computed, we calculate entropy to measure the unpredictability or randomness in the transitions.

**Overall Shannon Entropy for the Semi-Markov Matrix**

- The Overall Entropy for the semi-Markov matrix is calculated as:

Where:

- is the element of the semi-Markov matrix representing the probability of transitioning from state to state .

**State-Specific Entropy**

- The Entropy for Specific State is calculated by considering only the transitions originating from that state:

**NREM Entropy**

- NREM Entropy aggregates the entropy values of all NREM sleep stages (N1, N2, N3):

- 1. **Markov Transition Matrix Entropy**

For comparison, entropy can also be calculated using the standard Markov transition matrix (ignoring the time spent in each state):

- Overall Markov Entropy:

- State-Specific Markov Entropy:

- NREM Markov Entropy:

- 1. **Overall Entropy of the Transition Matrix (T_Overall_Entropy)**

The "T_Overall_Entropy"*measures the overall unpredictability or randomness in the transitions between all sleep stages as represented by the Markov transition matrix .

Where:

- is the probability of transitioning from state to state in the standard Markov transition matrix.

- The summation is taken over all possible transitions between the states.

- 1. **NREM Entropy of the Transition Matrix (T_NREM Entropy)**

The "T_NREM Entropy" measures the unpredictability or randomness of transitions specifically within the NREM sleep stages (N1, N2, N3) based on the Markov transition matrix .

Where:

- is the entropy for a specific state in the transition matrix .

- The summation for is taken over all NREM stages

- 1. **State-Specific Temporal Entropy**

The Temporal Entropy for each sleep stage (e.g., Wake, N1, N2, N3, REM) measures the unpredictability or randomness in the distribution of time durations spent in that particular stage.

For a given sleep stage , the Temporal Entropy is calculated as:

Where:

- is the probability associated with the -th duration spent in stage .

- , where is the -th duration and is the total number of duration entries for stage .

- The summation is over all temporal durations spent in stage .

- 1. **Overall Temporal Entropy**

The Overall Temporal Entropy is a measure of the randomness in the distribution of time durations across all sleep stages combined.

Where:

- is the probability associated with the -th duration across all sleep stages.

- , where is the -th duration across all stages, and is the total number of duration entries across all stages.

- The summation is over all temporal durations across all stages.

- 1. **NREM Temporal Entropy**

The NREM Temporal Entropy is specifically calculated for the combined NREM stages (N1, N2, N3), measuring the randomness in the distribution of time durations spent within these stages.

Where:

- is the probability associated with the -th duration within the NREM stages.

- , where is the -th duration in NREM stages, and is the total number of duration entries for NREM stages.

- The summation is over all temporal durations spent in the NREM stages.
