# Supplementary material for: Sleep Temporal Entropy as a Novel Digital Biomarker of Sleep Fragmentation for Cardiometabolic and Mortality Risk
Source: Research Square preprint supplement (doi:10.21203/rs.3.rs-7433027/v1), 2025-09-05
Supplement: Supplementary file 1 [file 20ea6d9165230fcec6eb8021.pdf]

|      |                                                         |                   |
|------|---------------------------------------------------------|-------------------|
| 主 题: | Re: Communications Medicine Partial Submission Past Due |                   |
| 发件人: | "Leng, Yue" <Yue.Leng@ucsf.edu>                         | 2025-3-22 4:46:09 |
| 收件人: | "Communications Medicine" <commsmed@nature.com>         |                   |

Great! Thank you very much for your kind understanding.

Best,  
Yue

---

**From:** Communications Medicine <[commsmed@nature.com](mailto:commsmed@nature.com)>  
**Sent:** Friday, March 21, 2025 12:59 AM  
**To:** Leng, Yue <[Yue.Leng@ucsf.edu](mailto:Yue.Leng@ucsf.edu)>  
**Subject:** RE: Communications Medicine Partial Submission Past Due

---

**This Message Is From an External Sender**

This message came from outside your organization.

Dear Dr Leng,

That would be fine. Please let us know once you are ready to complete the submission and we will reinstate the manuscript for you on the system.

Kind regards,  
**Caterina Timu**  
Editorial Assistant  
*Communications Journals*  
**Nature** Research

---

**From:** Leng, Yue <[Yue.Leng@ucsf.edu](mailto:Yue.Leng@ucsf.edu)>  
**Sent:** 20 March 2025 22:16  
**To:** Communications Medicine <[commsmed@nature.com](mailto:commsmed@nature.com)>  
**Subject:** Re: Communications Medicine Partial Submission Past Due

Dear Editorial Office,

Thank you for your reminder regarding our submission, COMMSMED-25-0352-T, and for extending the deadline to March 24th. To incorporate additional analyses and further enhance our manuscript, we kindly request an additional extension of 1–2 months.

We understand that the deadline can typically only be extended once, but we would greatly appreciate your consideration of our request given the significant improvements we aim to make. Please let us know if this request is possible or if alternative arrangements might be considered.

Thank you for your understanding and support. We look forward to your response.

Best regards,  
Yue

---

Yue Leng, PhD  
Associate Professor  
Department of Psychiatry and Behavioral Sciences  
Bakar Computational Health Sciences Institute (BCHSI)  
University of California, San Francisco  
675 18th Street, San Francisco, CA 94158  
<http://moonlait.ucsf.edu>  
<https://profiles.ucsf.edu/yue.leng>  
<https://twitter.com/YueLengsleep>

---

**From:** [commsmed@nature.com](mailto:commsmed@nature.com) <[commsmed@nature.com](mailto:commsmed@nature.com)>  
**Sent:** Tuesday, March 18, 2025 11:43 PM  
**To:** Leng, Yue <[Yue.Leng@ucsf.edu](mailto:Yue.Leng@ucsf.edu)>  
**Subject:** Communications Medicine Partial Submission Past Due

---

19th Mar 2025

Dear Dr. Leng,

Thank you again for choosing Communications Medicine. We have noticed that your submission, COMMSMED-25-0352-T, is still incomplete since our first follow-up email to you and is about to be deleted.

If you need more time and have still not utilized the extension link provided in our previous email to you, we suggest you use this now. Please note that your deadline can only be extended once and if you have already used the extension link it will now be inactive.

However if you are experiencing problems with your submission or need more time, please do not hesitate to contact the editorial office directly at [commsmed@nature.com](mailto:commsmed@nature.com). To continue working on your submission please click here:

[https://mts-commsmed.nature.com/cgi-bin/main.plex?  
el=A3DK2BoB6A6vLy6F3A9ftdgsfLg5oPLz220Bfc1H6ewZ](https://mts-commsmed.nature.com/cgi-bin/main.plex?el=A3DK2BoB6A6vLy6F3A9ftdgsfLg5oPLz220Bfc1H6ewZ)

Best Regards,  
Admin MTS  
Staff  
Communications Medicine

This email has been sent through the Springer Nature Tracking System NY-610A-NPG&MTS

*Confidentiality Statement:*

*This e-mail is confidential and subject to copyright. Any unauthorised use or disclosure of its contents is prohibited. If you have received this email in error please notify our Manuscript Tracking System Helpdesk team at*

<http://platformsupport.nature.com> .

*Details of the confidentiality and pre-publicity policy may be found here*

<http://www.nature.com/authors/policies/confidentiality.html>

[Privacy Policy](#) | [Update Profile](#)
